# Supplementary material
Source: PubMed Central journal article supplement (PMC10148844)

# Full Blot Figure 1E

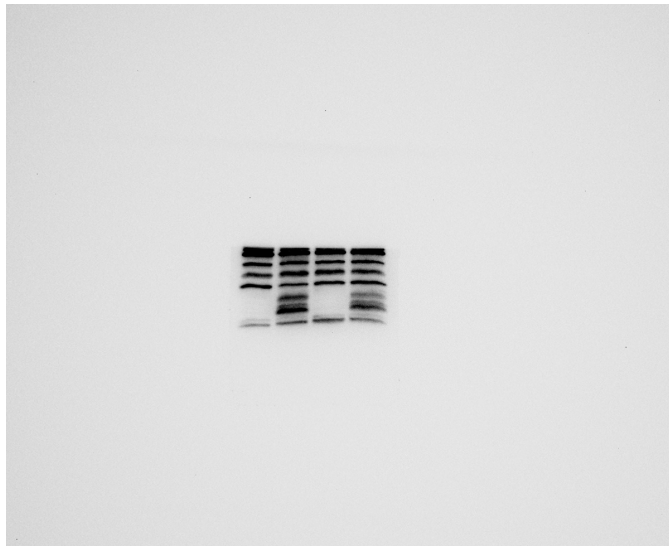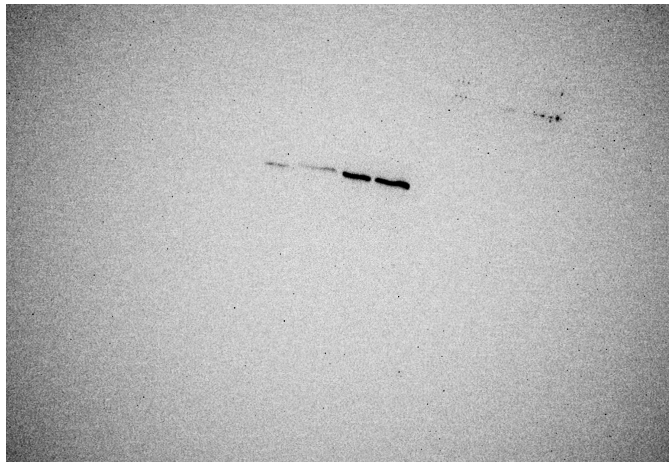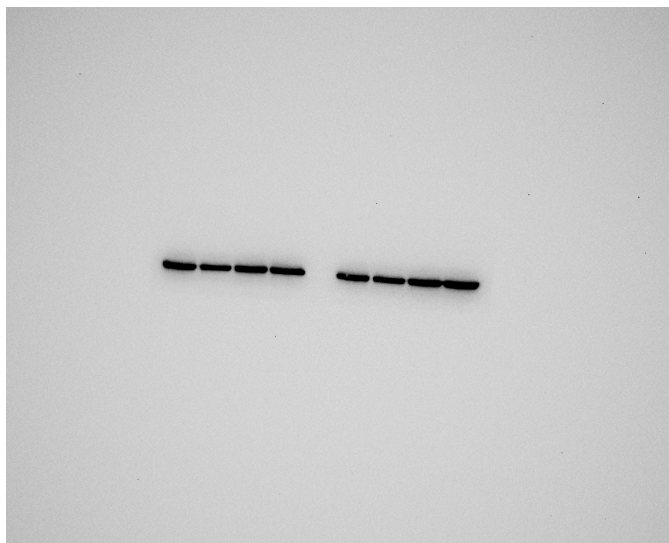

Full Blot Figure 4A

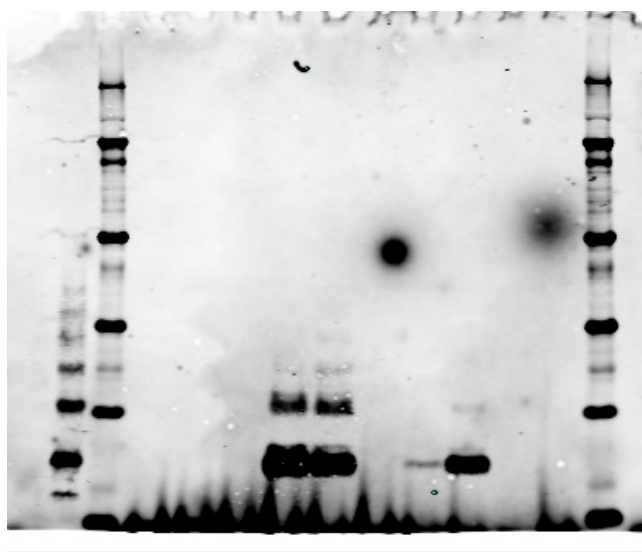

Supplement: 41419_2023_5817_MOESM3_ESM.pdf [file 41419_2023_5817_MOESM3_ESM.pdf]
